# Supplementary material for: PEMT Mediates Hepatitis C Virus-Induced Steatosis, Explains Genotype-Specific Phenotypes and Supports Virus Replication
Source: MDPI journal article supplement (doi:10.3390/ijms24108781), 2023-05-15
Supplement: s1 [file s1]

## Supplementary Figures

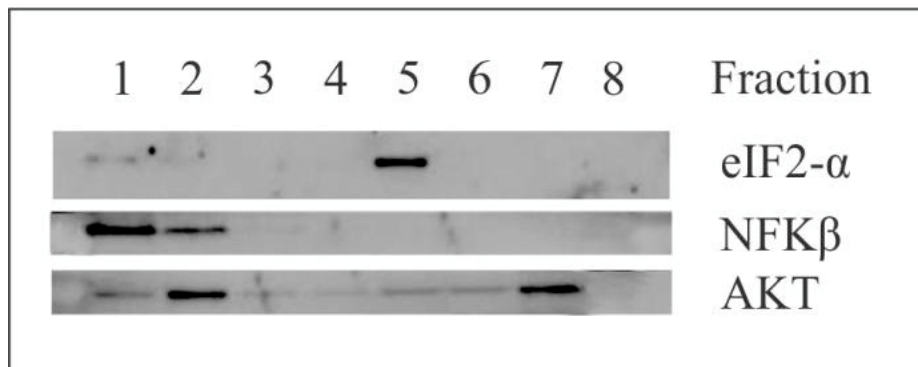

**Figure S1: Western blot analysis of subcellular proteins to verify the purity of isolated ER.** Subcellular fractionation of JHF1 infected and control Huh-7 cells was performed by discontinuous sucrose gradient centrifugation. Protein (20  $\mu$ g) from each fraction was separated by 10% SDS PAGE and transferred onto PVDF membranes. Blotted proteins were probed for markers of ER (eIF2- $\alpha$ ), nucleus (NF- $\kappa$ B) and cytosol (AKT).
